# Supplementary material for: BRAF Inhibitors Induce Feedback Activation of RAS Pathway in Thyroid Cancer Cells
Source: MDPI journal article supplement (doi:10.3390/ijms22115744), 2021-05-27
Supplement: s1 [file s1]

Supplementary Figure 1

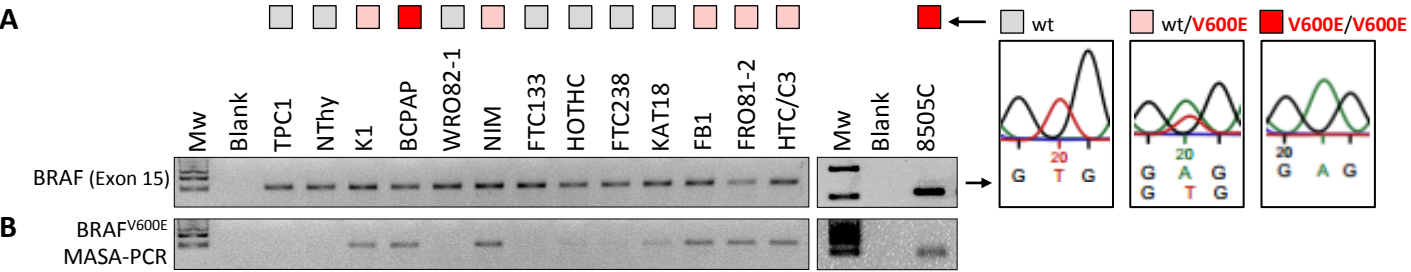

**Figure S1. BRAF<sup>V600E</sup> mutation testing in thyroid cancer cell lines.**  
**A - B.** BRAF<sup>V600E</sup> mutation was assessed in 13 thyroid cancer (TC) cell lines and in the non-neoplastic thyroid (NT) control Nthy cells by BRAF exon 15 specific PCR followed by automated Sanger sequencing and by mutant-allele-specific-amplification(MASA)-PCR method. PCR products were resolved by ethidium bromide stained agarose gel electrophoresis. On the right three representative electropherograms obtained for BRAF wt or mutated (hetero- or homo-zygous) cell lines.  
Abbreviations: Mw, molecular weight markers 100 base pairs; Blank, PCR mix reaction negative control; wt, wild-type;

A

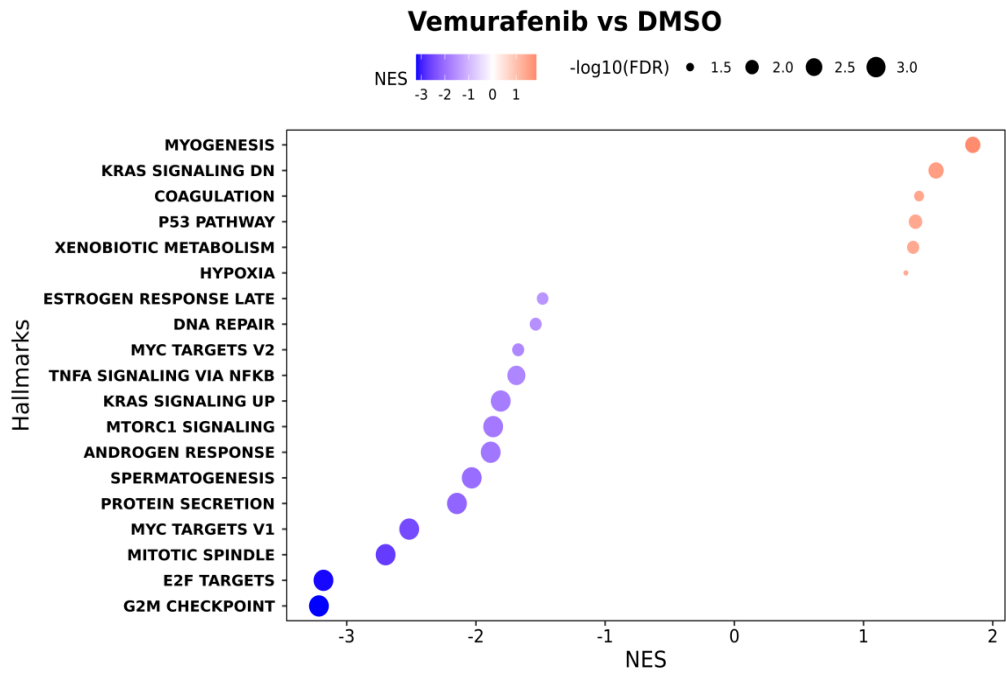

B

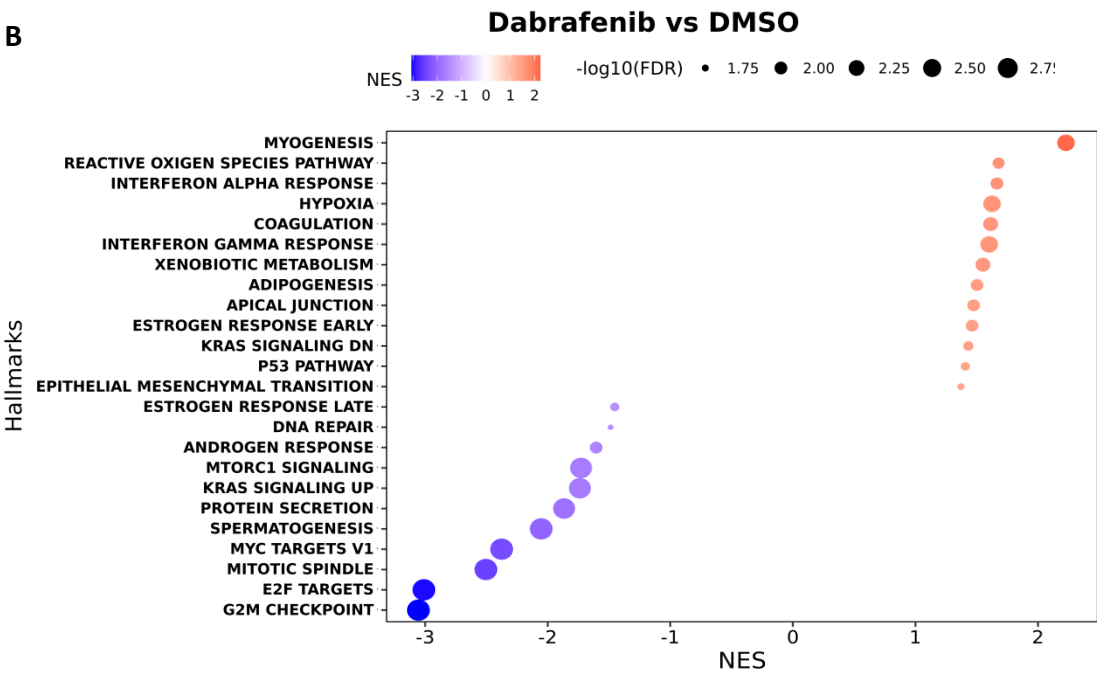

**Figure S2. Gene set enrichment analysis with Hallmarks gene set collection in BCPAP cells treated with BRAF inhibitors.** Dot plots showing all the significantly enriched gene sets (FDR < 0.05) from GSEA Hallmarks collection in BCPAP cells treated with Vemurafenib (A) or Dabrafenib (B) versus control cells treated with DMSO. The red-to-blue colored-scale bar represents the normalized enrichment score (NES). The point size indicates the magnitude of the statistical significance expressed as  $-\log_{10}$  of the FDR.

Supplementary Figure3

A

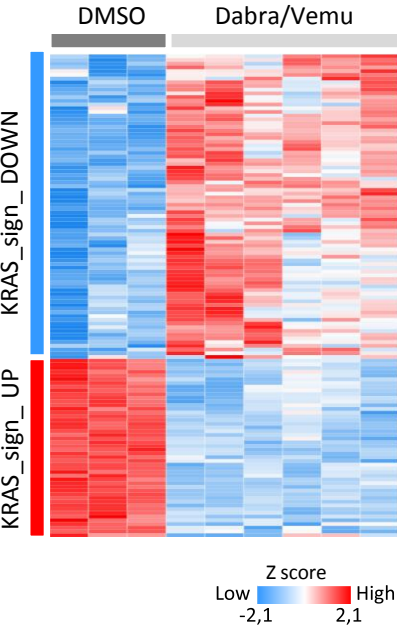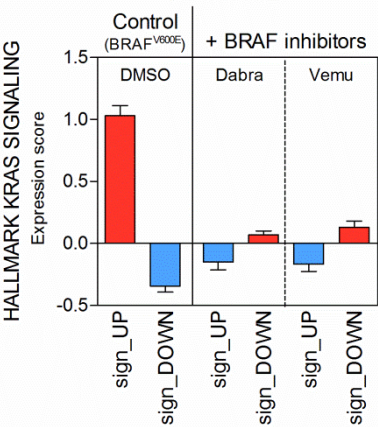

B

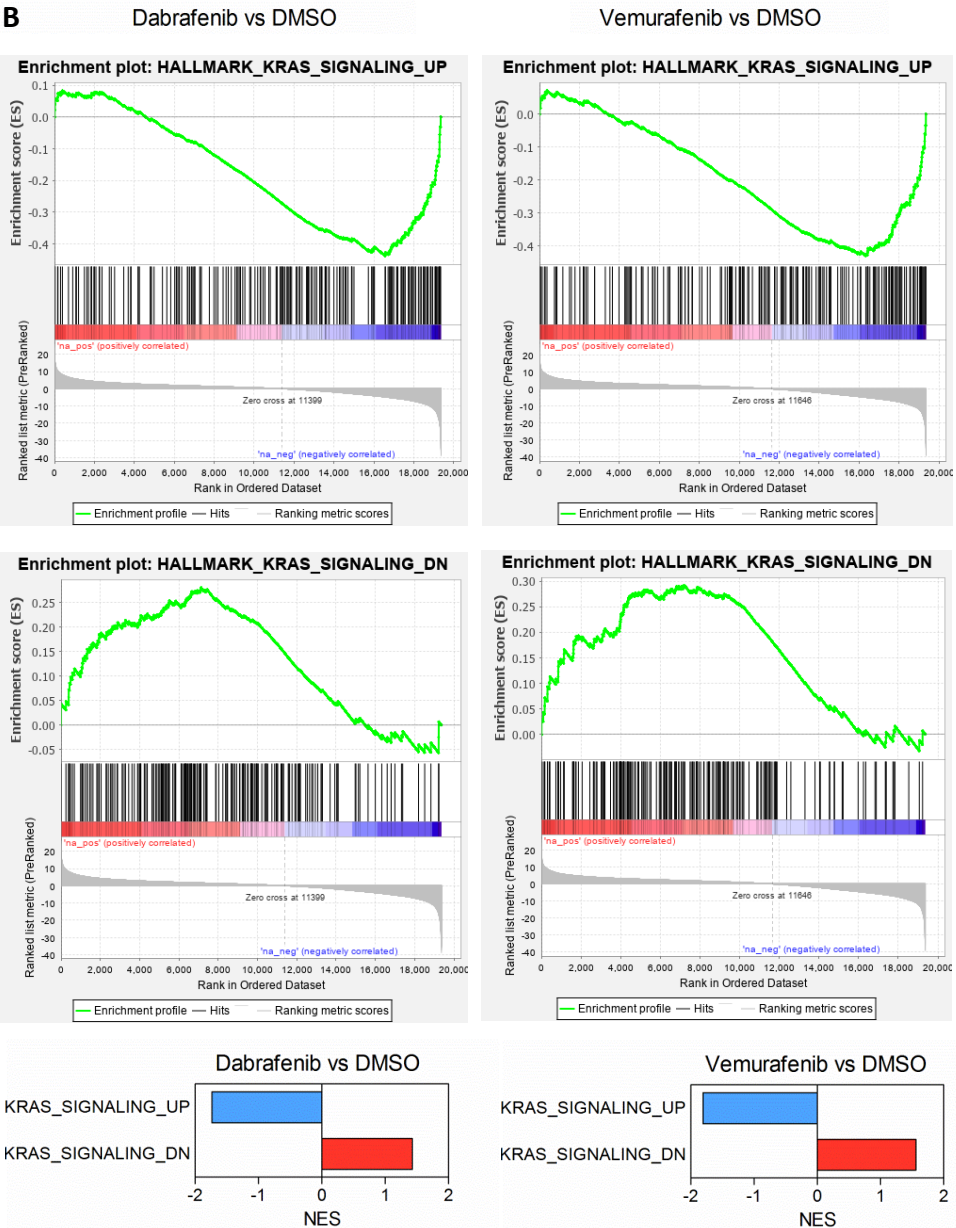

Figure S3. GSEA on Hallmark KRAS signaling gene sets in BCPAP cells treated with BRAF inhibitors.

**A.** Heatmap showing the expression of KRAS\_SIGNALING\_UP and KRAS\_SIGNALING\_DN gene in BCPAP cells; the leading-edge subset of genes common across the two treatment are specifically showed. Below the corresponding expression score calculated as mean of log2-transformed and median-centered gene levels; separate scores were calculated for the KRAS\_SIGNALING\_UP (sign\_UP) and KRAS\_SIGNALING\_DN (sign\_DOWN) gene sets. **B.** Enrichment plots from GSEA conducted in BCPAP cells treated with BRAF inhibitors (Dabrafenib or Vemurafenib) versus control cells (DMSO). The KRAS\_SIGNALING\_UP and the KRAS\_SIGNALING\_DN gene sets of Hallmarks collection are specifically showed. The red-to-blue color bar shows the ranking of the genes of each dataset from up- to down-regulated in Dabrafenib or Vemurafenib, lower and upper panel respectively. The vertical black bars indicate the position of BCPAP cell genes along the ranked gene list. The green line shows the running enrichment score (ES) along the ranked gene list. The corresponding normalized enrichment scores (NES) are reported below the enrichment plots.

Supplementary Figure 4

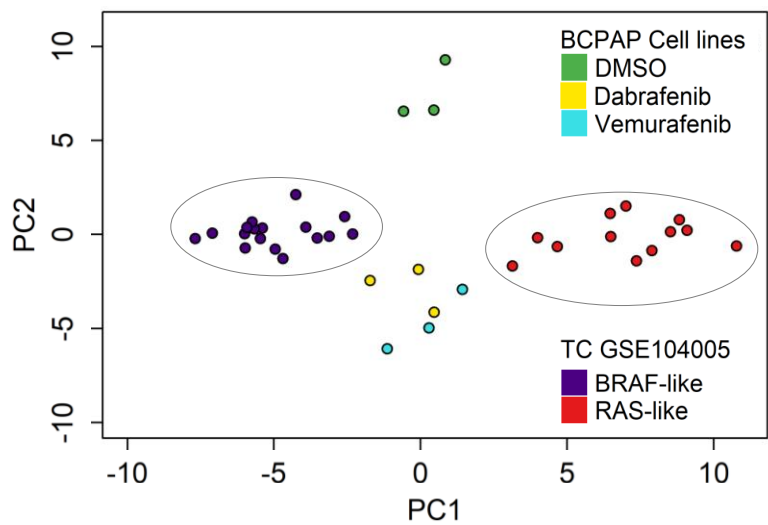

**Figure S4. Unsupervised analysis using the BRAF-RAS signaling gene signature in BCPAP cells and in thyroid cancer tissues.** Principal component analysis (PCA) using the BRAF/RAS-like gene signature calculated in the merged dataset with BCPAP cells and in human thyroid cancer (TC) tissues derived from the dataset GSE104005. For TC tissues the feature relative to the BRAF- or RAS-like subtype has been previously established and here showed; TC tissues are highlighted by circles

Supplementary Figure 5

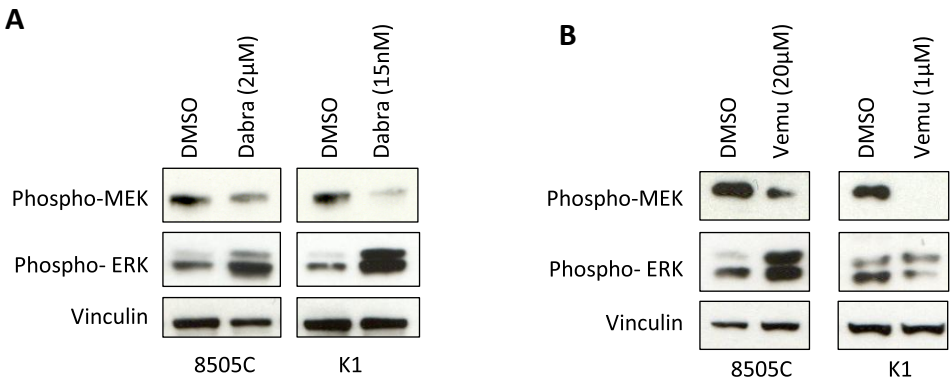

**Figure S5. Alternative MAPK pathway activation upon BRAF inhibitors treatment in 8505C and K1 cell lines.** Western blot analysis in the thyroid cancer derived cell line 8505C and K1 treated with Dabrafenib (A) or Vemurafenib (B) for 48h compared to control cells treated with vehicle DMSO. Vinculin included as protein loading control.

**Supplementary Table S1.**

Characterization of the thyroid cancer derived cell lines used in the present study

| Tissue type | Cell line   | STR profile (reference) | BRAF mutation (this study) | BRAF mutation (reference) |
|-------------|-------------|-------------------------|----------------------------|---------------------------|
| NT          | Nthy-ori3-1 | CVCL_2659               | wt                         | [3]                       |
| PTC         | K1          | CVCL_2537               | <b>V600E</b> /wt           | [3]                       |
| PTC         | NIM1        | CVCL_5344 <sup>a</sup>  | <b>V600E</b> /wt           | [4]                       |
| PTC         | BCPAP       | CVCL_0153               | <b>V600E/V600E</b>         | [3]                       |
| PTC         | TPC1        | CVCL_6298               | wt                         | [3]                       |
| FTC         | WRO82-1     | [1] <sup>b</sup>        | wt                         | [5]                       |
| FTC         | FTC133      | CVCL_1219               | wt                         | [3]                       |
| FTC         | FTC238      | CVCL_2447               | wt                         | [3]                       |
| ATC         | 8505C       | CVCL_1054               | <b>V600E/V600E</b>         | [3]                       |
| ATC         | FB1         | CVCL_A603 <sup>a</sup>  | <b>V600E</b> /wt           | This study <sup>c</sup>   |
| ATC         | FRO81-2     | [2] <sup>b</sup>        | <b>V600E</b> /wt           | [5]                       |
| ATC         | HTC/C3      | CVCL_1295               | <b>V600E</b> /wt           | [3]                       |
| ATC         | HOTHc       | CVCL_8708               | wt                         | This study <sup>c</sup>   |
| ATC         | KAT18       | CVCL_6303               | wt                         | [3]                       |

Abbreviation: NT, non-neoplastic thyroid; PTC, papillary thyroid carcinoma; FTC, follicular thyroid carcinoma; ATC, anaplastic thyroid carcinoma; wt, wild type; CVCL, Cellosaurus ID (reference cell line ID)

[1] Xu, X. *et al.* Endocr Relat Cancer 2012, 19, 167-179;

[2] Shimamura, M. *et al.* Endocr J 2014, 61, 481-490;

[3] Landa, I. *et al.* Clin Cancer Res 2019, 25, 3141-3151;

[4] Degl'Innocenti, D. *et al.* PLoS One 2010, 5(9), e12701;

[5] Namba, H. *et al.* J Clin Endocrinol Metab 2003, 88, 4393-4397;

<sup>a</sup> No STR profiles are reported for these cell lines. The STR profiles identified in the present study are unique and different from those of other cell lines. NIM1: Amelogenin, X; CSF1PO, 9 and 10; D13S317, 10 and 14; D16S539, 10 and 12; D21S11, 30; D5S818, 9 and 10; D7S820, 11; TH01, 9; TPOX, 8; vWA, 16 and 20. FB1: Amelogenin, X; CSF1PO, 11 and 12; D13S317, 14; D16S539, 10 and 11; D21S11, 29 and 30; D5S818, 11 and 12; D7S820, 10; TH01, 7 and 9; TPOX, 8 and 9; vWA, 16 and 17.

<sup>b</sup> Conflicting data on STR profiles for these cell lines; the STR profiles identified in the present study matched with those reported in the indicated reference.

<sup>c</sup> No previous reports on BRAF mutation assessment in these cell lines.

## Supplementary Table S2.

Lists of genes included in the TCGA-derived gene signature related to thyroid cancer

| MAPK output | Thyroid differentiation | BRAF-RAS signaling |                  |
|-------------|-------------------------|--------------------|------------------|
| ARID5A      | TSHR                    | ANKRD46            | RUNX2            |
| B4GALT6     | DUOX1                   | CYB561             | SDC4             |
| BRIX1       | TG                      | GNA14              | SEL1L3           |
| BYSL        | THRB                    | HGD                | SFTPB            |
| CCND1       | DIO1                    | KATNAL2            | SLC35F2          |
| CD3EAP      | DIO2                    | KCNAB1             | SOX4             |
| CHSY1       | DUOX2                   | KCNIP3             | SPOCK2           |
| DDX21       | FOXE1                   | LGI3               | STK17B           |
| DUSP4       | GLIS3                   | MLEC               | SYT12            |
| DUSP6       | THRA                    | NQO1               | TACSTD2          |
| EGR1        | SLC5A5 (NIS)            | SFTPC              | TBC1D2           |
| ELOVL6      | SLC26A4                 | SLC4A4             | TGFBR1           |
| ETV4        | SLC5A8                  | SORBS2             | TMEM43           |
| ETV1        | NKX2-1                  | ABTB2              | FAM176A (EVA1A)  |
| ETV5        |                         | AHR                | TM7SF4 (DCSTAMP) |
| FOS         |                         | ANKLE2             | PVRL4 (NECTIN4)  |
| FOSL1       |                         | ANXA1              | DTX4             |
| GEMIN4      |                         | ARNTL              | ANXA2P2*         |
| GNL3        |                         | ASAP2              | FLJ23867*        |
| GPR3        |                         | BID                |                  |
| GTF2A1L     |                         | CDC42EP1           |                  |
| GTPBP4      |                         | COL8A2             |                  |
| HMGA2       |                         | CREB5              |                  |
| HYDIN       |                         | CTSC               |                  |
| IER3        |                         | CYP1B1             |                  |
| CXCL8 (IL8) |                         | DUSP5              |                  |
| LIF         |                         | ETHE1              |                  |
| MAFF        |                         | FAM20C             |                  |
| MAP2K3      |                         | FCHO1              |                  |
| MYC         |                         | FN1                |                  |
| NOP16       |                         | FSTL3              |                  |
| PHLDA2      |                         | GABRB2             |                  |
| PLK3        |                         | GBP2               |                  |
| POLR1C      |                         | ITGA3              |                  |
| POLR3G      |                         | ITGB8              |                  |
| PPAT        |                         | KCNN4              |                  |
| RRS1        |                         | LAMB3              |                  |
| SEMA6A      |                         | LLGL1              |                  |
| SH2B3       |                         | LY6E               |                  |
| SLC1A5      |                         | MDFIC              |                  |
| SLC4A7      |                         | MET                |                  |
| SPRED2      |                         | PDE5A              |                  |
| SPRY2       |                         | PDLIM4             |                  |
| SPRY4       |                         | PLCD3              |                  |
| TNC         |                         | PLEKHA6            |                  |
| TNFRSF12A   |                         | PNPLA5             |                  |
| TSR1        |                         | PPL                |                  |
| WDR3        |                         | PRICKLE1           |                  |
| YRDC        |                         | PROS1              |                  |
| KIR3DL2 *   |                         | PTPRE              |                  |
| PPAN *      |                         | RASGEF1B           |                  |
| PYCRL*      |                         | RUNX1              |                  |

\* These genes were not available for BCPAP cells gene profiles and were excluded from score computation.

Alternative gene alias are showed in brackets.
